# 1 **DISRUPTIONS IN LIVELIHOODS, HEALTHCARE ACCESS AND HEALTH** 2 **OUTCOMES IN WEST AFRICA DURING EMERGING INFECTIOUS DISEASE** 3 **OUTBREAKS**

4 Rashid Ansumana<sup>1\*</sup>, Alfred S. Bockarie<sup>2</sup>, Monya Konneh<sup>1</sup>, Najmul Haider<sup>3</sup>, Eniola Cadmus<sup>9</sup>,  
5 Alberta Korvah<sup>5</sup>, Joyce Fayiah<sup>5</sup>, Yolaine Kate Waka-Metzger<sup>5</sup>, Angella M. George<sup>1</sup> Gassimu  
6 Mallah<sup>9</sup> Joseph M. Lamin<sup>1</sup>, Osman Dar<sup>8</sup>, Susannah Mayhew<sup>7</sup>, Doris Bah<sup>10</sup>, Pepe Bilivigoi<sup>9</sup>,  
7 Nfaly Maggasouba<sup>4</sup>, Simeon Cadmus,<sup>6</sup> Robyn Alders<sup>8</sup>.

## 8 9 **Affiliations**

- 10 1. School of Public Health, College of Medical Sciences, Njala University, Bo Campus
- 11 2. Institute of Environmental Management and Quality Control, School of Environmental  
12 Sciences, Njala University, Njala Campus
- 13 3. Keele University, United Kingdom
- 14 4. University of Gamel Abdel Nasser of Conakry, Conakry Guinea
- 15 5. National Public Health Institute of Liberia, Monrovia, Liberia
- 16 6. University of Ibadan, Ibadan, Nigeria
- 17 7. London School of Hygiene and Tropical Medicine, UK
- 18 8. Australia National University
- 19 9. Ministry of Health, Guinea
- 20 10. Ministry of Health, Sierra Leone

21  
22 **\*Correspondence:** Rashid Ansumana(PhD), School of Public Health, College of Medical  
23 Sciences, Njala University. Email: [r.ansumana@njala.edu.sl](mailto:r.ansumana@njala.edu.sl)

## 24 25 **ABSTRACT**

26 **Background:** Outbreaks of infectious diseases like Ebola virus disease, Lassa fever, and  
27 COVID-19 have severely strained infrastructural systems and social services across West Africa.  
28 We investigated the disruptions caused by emerging outbreaks on access to healthcare, health  
29 outcomes, and livelihoods in West Africa.

30  
31 **Method:** A mixed-methods approach was utilized, conducting extensive studies in Nigeria,  
32 Sierra Leone, Guinea, and Liberia through structured questionnaires, in-depth interviews with  
33 key informants, and focus group discussions. Using a device-to-cloud system guided by GIS for  
34 randomized sampling across the four nations, this technique allowed us to comprehensively  
35 analyze implications across imposed lifestyle changes on health and wellbeing due to disrupted  
36 healthcare.

## 37 38 **Results**

39  
40 Our findings indicate drastic shifts in food consumption patterns and healthcare access. In  
41 Guinea, self-reported “Once Daily” meals astonishingly surged from 148 to 775 individuals  
42 ( $p < 0.001$ ), with analogous substantial increases observed in Liberia and Sierra Leone. Nigeria  
43 exhibited a varied response, with notable rises both in “Once Daily” and “Twice Daily” meal  
44 frequencies ( $p < 0.001$ ), reflecting broad dietary adaptations out of necessity. Additionally, there  
45 was a significant decrease in consumption of traditional protein sources like bushmeat, beef, and  
46 mutton, mainly because of disrupted supply chains and heightened concerns over food insecurity.

47 Conversely, fish consumption slightly fell possibly due to its perceived safety or accessibility  
48 amidst the outbreak.

49  
50 Healthcare services faced severe disruptions, particularly acute in Sierra Leone and Liberia  
51 compared to Guinea and Nigeria. The interruption of services drastically impacted everything  
52 from immunization rates to mental health, with a rise in reported anxiety and depression  
53 alongside public dissatisfaction towards the healthcare disruptions.

54  
55 **Conclusion:** This study demonstrates the dramatic effects of infectious disease outbreaks on  
56 health access and diets in West Africa. The research calls for integrating health initiatives with  
57 social protection to strengthen the resilience of societies to meet all types of health challenges. It  
58 is imperative districts establish robust health systems and social security mechanisms to counter  
59 future public health crises.

60  
61  
62  
63  
64  
65  
66  
67  
68  
69  
70  
71  
72  
73  
74  
75  
76  
77  
78  
79  
80  
81  
82  
83  
84  
85  
86  
87  
88  
89  
90  
91  
92

93

## 94 **BACKGROUND**

95 The intricate relationship between health and socio-economic well-being is deeply rooted in the  
96 fabric of human society. At the confluence of these critical dimensions lies the healthcare  
97 system, a fundamental pillar that ensures a population's health and vitality and acts as a sentinel  
98 for broader socio-economic stability. West Africa, with its unique socio-cultural, economic, and  
99 political landscapes, has unfortunately been a recurrent epicentre for infectious disease  
100 outbreaks, notably the Ebola Virus Disease (EVD) in 2014-2016(Ansumana et al., 2014;  
101 Ansumana et al., 2017), Lassa fever (Ogbu, Ajuluchukwu and Uneke, 2007; Tambo, Adetunde  
102 and Olalubi, 2018; Kofman, Choi and Rollin, 2019) and, more recently, the COVID-19  
103 pandemic(Ansumana, Sankoh and Zumla, 2020; Sumner, Hoy and Ortiz-Juarez, 2020). These  
104 outbreaks, while primarily health crises have invariably cast ripple effects, perturbing healthcare  
105 access, undermining livelihoods, and precipitating adverse health outcomes.

106

107 The importance of consistent and robust healthcare access cannot be overstated. In the context of  
108 West Africa, healthcare access is not only pivotal for managing endemic diseases such as  
109 malaria, tuberculosis, and HIV/AIDS but also for providing essential maternal and child health  
110 services(Smith and Whittaker, 2014). Outbreaks tend to exacerbate challenges faced by  
111 healthcare systems in resource-poor countries.

112 The economic backbone of many West African nations is agriculture, which employs a  
113 significant portion of the population. During outbreaks, lockdowns, travel restrictions, and  
114 market closures disrupt agricultural activities and supply chains. This has far-reaching  
115 consequences, including job loss, decreased income, and food insecurity, especially in rural  
116 areas(Egeru et al., 2020; Kipchumba et al., 2023).

117 For instance, during the EVD outbreak, many healthcare facilities in affected countries either  
118 closed or significantly reduced their operations due to fear of transmission, lack of protective  
119 equipment, or workforce attrition(Parpia *et al.*, 2016). This curtailment reduced access to  
120 essential health services, increasing morbidity and mortality from non-Ebola causes(J W T  
121 Elston *et al.*, 2017).

122

123 Furthermore, the socio-economic ramifications of outbreaks in West Africa are profound.  
124 Livelihoods, particularly in informal sectors, are often the first to be affected. As movement  
125 restrictions and lockdowns are implemented to curb the spread of disease, daily wage earners,  
126 small-scale traders, and artisans face immense challenges in sustaining their income(Vinck *et al.*,  
127 2019). This economic disruption, in turn, affects purchasing power and exacerbates food  
128 insecurity, further compromising vulnerable populations' nutritional and health status(WFP,  
129 2020).

130

131 Animal health is linked to human health and livelihoods, particularly in regions like West Africa.  
132 The concept of 'One Health' recognises that the health of people, animals, and the environment is  
133 interconnected(Conrad, Meek and Dumit, 2013). Outbreaks often have zoonotic origins, where  
134 infectious diseases are transmitted between animals and humans. For instance, the EVD outbreak  
135 is believed to have originated from bats and potentially transmitted to humans via the  
136 consumption of bushmeat(Olival and Hayman, 2014). Similarly, other pathogens with potential  
137 for outbreaks, such as Lassa and Marburg infectious disease and monkeypox, have animal  
138 reservoirs(Mylne *et al.*, 2015). Disruptions caused by outbreaks can impact veterinary care and

139 animal vaccination programs, elevating the risk of disease transmission between animals and  
140 humans.

141 Additionally, many of West Africa's livelihoods depend on livestock and agriculture. Disease  
142 outbreaks among livestock can thus compound the socioeconomic challenges posed by human  
143 health crises (Rich and Wanyoike, 2010). Recognizing and addressing the intersection of animal  
144 and human health is essential for a comprehensive understanding of outbreak impacts and for  
145 devising effective intervention strategies.

146 Moreover, the broader health outcomes associated with these disruptions are multifaceted.  
147 Beyond the immediate morbidity and mortality from the outbreak, there is a cascade of  
148 secondary health implications. Reduced immunization coverage, for example, predisposes  
149 populations to vaccine-preventable diseases (Cooper *et al.*, 2023). Additionally, mental health  
150 issues, often overlooked, emerge as significant concerns, with people grappling with anxiety,  
151 depression, and post-traumatic stress exacerbated by stigma and societal disruption (Shultz *et al.*,  
152 2016).

153 This paper aims to elucidate the interconnections and implications of disruptions in healthcare  
154 access, livelihoods, and health outcomes in West Africa during outbreaks. Through a  
155 comprehensive review of the literature and primary data, we will explore the multi-dimensional  
156 impacts of these disruptions and reflect upon strategies to mitigate their consequences.

157

## 158 **METHODS**

159

### 160 **Study Design**

161 This study adopted a mixed-methods approach, blending quantitative and qualitative data  
162 collection techniques, to delve into the disruptions in healthcare access, livelihoods, and health  
163 outcomes in West Africa amid outbreaks. Both prospective and retrospective data gathering were  
164 undertaken, offering a holistic depiction of the healthcare landscape during the outbreak  
165 episodes.

### 166 **Setting and Population**

167 The research spanned four pivotal West African countries: Nigeria, Sierra Leone, Guinea, and  
168 Liberia. These countries were deliberately chosen considering their distinct experiences with  
169 outbreaks, enabling a multifaceted perspective on healthcare disruptions.

### 170 **Data Collection Tools and Strategy**

171 A structured survey was curated and disseminated via the Open Data Kit (ODK) platform for the  
172 quantitative dimension. Responses from these surveys were securely stored and managed on the  
173 ONA server at <https://ona.io/waohecostudy>.

174 Parallely, the qualitative dimension encompassed in-depth interviews and focus group  
175 discussions designed to extract richer insights into individual and community experiences,  
176 perceptions, and recommendations surrounding healthcare disruptions.

177 Random sampling was employed to ensure representativeness across diverse population subsets.  
178 The survey was directed using Geographic Information Systems (GIS), where geolocations of  
179 potential participants were randomly chosen. This GIS-directed approach enabled a spatially  
180 representative sample, ensuring that diverse geographical areas and their associated populations  
181 were adequately represented.

### 182 **Sample Size Determination**

183 Using the OpenEpi tool, each country's sample sizes were independently deduced, anchored on  
184 their respective SARS-CoV-2 seroprevalence rates. These computations were designed to

185 achieve a 95% confidence interval (CI), factoring in elements like design effect, projected  
186 response rates, and possible contingencies such as non-responses or partial data.

### 187 **Quality Assurance**

188 To maintain the highest data quality and ensure methodological rigor, daily dashboard  
189 monitoring was instituted to track and review incoming data in real time.

190 Surveyors documented their activities with photographs taken on-site, serving as a validation  
191 mechanism. Regular supervisory site visits were conducted to oversee the data collection  
192 process. Peer monitoring was employed, where teams cross-checked and validated each other's  
193 work, ensuring consistency and accuracy.

### 194 **Data Analysis**

195 Quantitative datasets were subjected to rigorous statistical analysis, with descriptive statistics  
196 elucidating the overall trends and inferential statistics employed for hypothesis testing and  
197 inference derivation.

198  
199 Concurrently, qualitative data, sourced from interviews and discussions was transcribed  
200 verbatim. Thematic content analysis was then performed to discern emergent patterns and  
201 themes contextualized within the overarching healthcare disruption narrative.

### 203 **Ethical Considerations**

204  
205 Before their involvement, all participants rendered informed consent. Utmost confidentiality was  
206 observed throughout, with data being anonymised or pseudonymised. Ethical clearance was  
207 sought and obtained from relevant ethical review boards across the participating nations.

## 209 **RESULTS**

### 210 **Outbreaks and Meal Frequency**

211 We assessed the impact of an outbreak (SARS-CoV-2) on meal frequency patterns in Guinea,  
212 Liberia, Sierra Leone, and Nigeria. We categorized meal frequencies as 'Once Daily,' 'Twice  
213 Daily,' and 'Thrice Daily,' conducting statistical analyses to determine the significance of the  
214 changes observed (Table 1).

215  
216 In Guinea, there was a statistically significant increase in individuals consuming 'Once Daily'  
217 meals, from 148 before the outbreak to 775 during the outbreak ( $p < 0.001$ ). Liberia displayed a  
218 similar trend in the increase of 'Once Daily' meal frequency, from 2,178 to 4,345 occurrences ( $p$   
219  $< 0.001$ ). Sierra Leone followed this regional pattern, with 'Once Daily' meal frequency rising  
220 from 1,806 to 2,872 ( $p < 0.001$ ). A significant reduction was also noted in 'Twice Daily' meals,  
221 from 3,374 to 2,620 ( $p < 0.001$ ).

222  
223  
224 Nigeria, while experiencing an increase in 'Once Daily' meal frequency from 11 to 98 ( $p <$   
225  $0.001$ ), showed an increase in 'Twice Daily' meals from 244 to 634 ( $p < 0.001$ ).

226  
227 The observed increase in 'Once Daily' meal frequencies across all countries examined suggests a  
228 region-wide shift in dietary patterns due to the outbreak's impact, echoing the findings of global  
229 health crises in the literature (Hendriks *et al.*, 2022; Koyratty *et al.*, 2022, 2022; Marti and  
230 Puertas, 2022; Lewis *et al.*, 2023). The significant reduction in 'Thrice Daily' meals is consistent

231 with patterns observed in food-scarce situations elsewhere in the world(González-Monroy *et al.*,  
232 2021).

233  
234 The decline in 'Twice Daily' meals in Liberia, Sierra Leone and Guinea, contrary to the Nigerian  
235 data, indicates varied national responses to the outbreak. The reduction may reflect a more severe  
236 disruption of food systems compared to Nigeria, where an increase in 'Twice Daily' meals could  
237 suggest a different form of dietary adaptation, perhaps due to varying economic resilience or  
238 policy responses(Belton *et al.*, 2021; Schreiber *et al.*, 2022).

239  
240 Statistically significant p-values affirm that these dietary changes are associated with the  
241 outbreak conditions, supporting the theory that health crises exert considerable influence on food  
242 security and nutritional behaviors (Beyene, 2023). These changes underscore the necessity for  
243 robust food security interventions during health emergencies to prevent long-term adverse health  
244 outcomes.

245  
246

### 247 **Outbreaks and Household Protein Source Consumption in West Africa**

248 Our investigation into household protein source consumption across Sierra Leone, Liberia,  
249 Nigeria, and Guinea provides critical insights into the dietary impacts of the recent outbreak.  
250 Consistent with disruptions observed in food systems during public health emergencies, there  
251 was a notable decline in the consumption of various protein sources during the outbreak(Béné,  
252 2020; FAO, 2021).

253  
254 Fig 1: Change in Protein Source Consumption During SARS-CoV-2

255  
256 Before the outbreak, our data showed that common protein sources included bushmeat, beef, and  
257 mutton(Fig.1). In the subsequent period, the intake of these proteins significantly decreased, with  
258 the most pronounced reduction noted for bushmeat. This aligns with previous studies that have  
259 highlighted bushmeat as a potential zoonotic risk, particularly in West African contexts (Karesh  
260 *et al.*, 2005; Wolfe *et al.*, 2005). The decline in consumption of beef and mutton may be  
261 attributed to disrupted supply chains and heightened food security concerns, phenomena which  
262 are well-documented during health crises(World Bank, 2020).

263  
264 Interestingly, the data suggest a more moderate decrease in the consumption of fish, which might  
265 indicate a strategic pivot towards protein sources perceived to be safer or more readily available  
266 during the outbreak(Headey and Martin, 2016). The differential changes across the various  
267 protein sources suggest a complex interplay of factors influencing household dietary choices  
268 during the outbreak(Barrett, 2010).

269  
270 The observed shifts in consumption patterns underscored the profound effect of health crises on  
271 food security and dietary habits, emphasizing the need for robust food systems that can adapt to  
272 such challenges and protect vulnerable populations in the West African region(FAO, 2018).

273  
274 Further, our qualitative study from West Africa suggests a complex interplay between  
275 community skepticism towards health interventions and the practical aspects of food safety and  
276 handling, with implications for the spread of foodborne diseases. Direct quotes from the study

277 encapsulate the concerns: In Sierra Leone, it was noted that "Community beliefs about disease  
278 transmission from wild animals could lead to changes in hunting practices and dietary habits,  
279 affecting traditional food sources." The study further records that lockdowns brought significant  
280 challenges: "During lockdowns, community members find it difficult to feed their animals due to  
281 restrictions on movement, potentially impacting livestock health and food availability."  
282 Similarly, the situation in Nigeria mirrored these difficulties with animals also subjected to  
283 movement restrictions by their owners. The repercussions in Liberia included shifts in social  
284 behaviors: "Altered social norms and practices during outbreaks, such as reduced communal  
285 gatherings, can impact food distribution and consumption patterns within communities." In  
286 addition, the spread of misinformation about the origins of diseases from certain foods has  
287 resulted in altered dietary choices: "Misinformation or beliefs about disease origins from certain  
288 foods could lead to changes in dietary habits, affecting demand for specific food items." These  
289 insights from the field reveal the breadth and depth of the pandemic's impact on traditional ways  
290 of life and the potential risks that arise from altered food-related practices.

291  
292 **Healthcare Service Interruptions in West African Countries**  
293 During the SARS-CoV-2 pandemic, healthcare service interruptions were observed across  
294 several countries. We focused our analysis on Sierra Leone, Liberia, Guinea, and Nigeria to  
295 understand the extent of these interruptions.  
296 In Sierra Leone, Liberia, and Guinea, the patterns of healthcare service interruptions were  
297 notably similar (Fig 2). The three most frequently interrupted services in these countries were:  
298 immunization, malaria treatment and routine bed net distribution.

299  
300 Despite exhibiting a similar trend with immunization being the most interrupted service, Nigeria  
301 displayed distinct differences in the ranking of other services compared to Sierra Leone, Liberia,  
302 and Guinea.  
303 The chart below provides a visual representation of the healthcare service interruptions in these  
304 countries:  
305

306 Fig. 2: Healthcare Services Disruption Reported by Country

307  
308 By quantifying the interruptions, our analysis reveals the significant impact of the SARS-CoV-2  
309 pandemic on essential healthcare services in West Africa. The disruption of crucial services,  
310 such as immunisation, underscores the cascading effects of global health crises on regional  
311 healthcare systems.  
312 Liberia and Sierra Leone had more disruptions than Guinea and Nigeria (Fig 3).

313  
314  
315  
316 Fig. 3: Choropleth Map of Healthcare Service Disruptions in West Africa

317  
318 Additional in-depth analyses of one country, Sierra Leone, which had a high level of disruptions  
319 revealed further the extent of service disruptions by outbreaks such as SARS-CoV-2.

320  
321 **Disruptions in HIV Health Services**

322 Our detailed examination of the repercussions of the SARS-CoV-2 pandemic on specific HIV  
323 services between 2019 and 2020 underscores significant variations in service provision (Fig 4).

324  
325 Fig 4: Disruptions in HIV Services

326  
327 The care and services provided to HIV-exposed infants were noticeably impacted: There was a  
328 pronounced decline observed in the "HIV-exposed infant follow-up visit" service, indicating  
329 potential barriers to continuous care during the early phase of the pandemic. The "HIV-exposed  
330 infant first visit" also faced a substantial reduction, suggesting delays or challenges in initial care  
331 access for this vulnerable group.

332 For adult HIV treatment, while some adult services highlighted resilience, others indicated  
333 vulnerabilities: "ART Adult defaulted" for both males and females increased, emphasizing  
334 potential challenges in maintaining treatment adherence during the pandemic. Interestingly,  
335 "ART Adult given ARV new" for both genders witnessed growth. This could be interpreted as an  
336 increase in new HIV diagnoses or improved access to treatment during this challenging period.

337 Child HIV Treatment services demonstrated mixed outcomes: The "ART Child defaulter"  
338 service showcased stability, with only a slight decline, indicating the relative robustness of  
339 treatment adherence mechanisms for children.

340 On the contrary, "Child HIV positive Cotrimoxazole prophylaxis start" experienced a decrease,  
341 suggesting potential disruptions in preventive care for HIV-positive children.

342 In treatment transfers on treatment changes, the "ART Adult switched to 2nd line" service, a  
343 marker for treatment change, showed a significant drop. This could point to potential barriers to  
344 accessing alternative treatments when required.

345 Moreover, while the SARS-CoV-2 pandemic introduced challenges across the board in HIV  
346 services during 2020, the degree and nature of these disruptions varied widely. Specific services,  
347 especially those related to infants and treatment changes, faced pronounced challenges. These  
348 findings emphasize the importance of bolstering resilience in healthcare systems, especially for  
349 vulnerable demographics, in the face of global crises.

350  
351 **Disruptions in TB Services**

352 We observed a decline in both the number of HIV-positive TB patients receiving antiretroviral  
353 therapy (ART) and those receiving co-Trimoxazole preventive therapy from 2019 to 2020. This  
354 trend is likely indicative of the disruptions caused by the COVID-19 pandemic, which affected  
355 healthcare services globally, leading to challenges in accessing treatment for TB patients  
356 (Fig.5)

357  
358 Fig. 5: Trends in TB Treatment (2019-2021)

359  
360 There was a slight increase in the number of patients receiving both forms of treatment from  
361 2020 to 2021. This suggests a recovery or adaptation of TB services, possibly through the  
362 implementation of new strategies to deliver care amidst pandemic constraints.

363  
364 **Inpatient Service Disruption**

365



366 There was a dive in hospital admissions between 2019 and 2020 when SARS-CoV-2 started in  
367 Sierra Leone and a resurgence thereafter (Fig 6). The dive could be attributed to initial shocks  
368 from the outbreak.

369

370 Fig.6: Hospital Admissions and Year-Over-Year Changes in Sierra Leone

371 There is likely skepticism at the onset of outbreaks. A focus group discussion in Liberia noted  
372 thus: "Whenever they come those who are in front of it, when they tell us, we always have the  
373 belief that these people, that money they looking for again so that the notion we always carry.  
374 Most of the time we can say that the government naa bring the sickness to put it on the people so  
375 we can't listen to any advice." This reflects skepticism towards health interventions and a belief  
376 that disease outbreaks might be financially motivated or artificially induced, which can  
377 significantly affect healthcare seeking behavior and access.

378 There was a subsequent gradual, substantial rise in healthcare demand during the COVID-19  
379 period, further emphasizing the pandemic's profound effect on hospital admissions.

380 There was a mix of increases and decreases in inpatient admissions across different categories  
381 from 2018 to 2022. The years 2020 and 2021, which align with the height of the COVID-19  
382 pandemic, showed pronounced changes in admissions, with some categories experiencing  
383 significant disruptions (Fig. 7).

384

385 Fig.7: Hospital Admissions Trends

386

387 For the Intensive Care Admissions, a noticeable increase was observed from 2019 to 2021,  
388 possibly due to the severity of COVID-19 cases. However, there was a decline in 2022.

389 There was a significant increase in the number of children with pneumonia admissions in 2021  
390 and a slight decrease in 2022. The symptoms of pneumonia and COVID-19 can overlap,  
391 potentially leading to more admissions.

392 The number of admissions for malaria in individuals aged 15 and above peaked in 2019, declined  
393 in 2020 and 2021, and slightly rebounded in 2022. In the case of children with malaria, a decline  
394 from 2019 to 2020 was observed, followed by a steady increase in the subsequent years.

395 The shifts in inpatient admissions could be attributed to multiple factors, including the direct  
396 and indirect effects of the COVID-19 pandemic, changes in healthcare-seeking behaviors,  
397 hospital resource allocations, and other external events. The increase in intensive care and  
398 pneumonia-related admissions during the pandemic underscores the strain on healthcare  
399 systems and the potential overlap in symptoms between COVID-19 and other illnesses.  
400 Fluctuations in malaria admissions might reflect changes in healthcare access, seasonal  
401 patterns, or broader public health interventions.

402

403 **Community Perceptions of Healthcare Access and Utilization**

404 The study in West Africa revealed a multifaceted understanding of disease outbreaks, availability  
405 of healthcare infrastructure and health practices among community members. Respondents  
406 highlighted key insights:

407 In the case of healthcare access and utilization: challenges in accessing quality healthcare were  
408 prominent in all four countries, with many relying on pharmacies or traditional healers due to  
409 distant or inadequate health facilities. There was a notable reliance on traditional medicine for  
410 ailments during outbreaks.

411 "Most times, we go to the baba (traditional healer) because the hospital people don't treat us  
412 well...." (Nigeria Qualitative Study Transcription Notes).

413 In Liberia, lights were shed on the decision to seek care and the gender equal opportunity for  
414 community awareness campaigns for care. "In time pass it was just men but right after the Ebola  
415 outbreak there are people train in the community to carry on awareness. In case of anything they  
416 suspect they create awareness and to advise for the person to go to the facility even though it can  
417 be difficult for some of them to go to the facility." (Liberian In-depth Interview). This reflects a  
418 change in who takes charge of health safety in the community, shifting from a male-dominated  
419 decision-making process to a more inclusive approach post-Ebola.

420 Despite the potential gender equal awareness campaigns, at the onset of outbreaks, there is a  
421 tendency to boycott the healthcare facilities. "For us when they talk it, we can't believe it...They  
422 will be explaining it to us we be going different way but when it attacks us naa then we will run  
423 to the health center." (Liberian In-depth Interview). This quote suggests a common initial denial  
424 of disease outbreaks among community members, followed by a reactive approach to seeking  
425 healthcare once the disease has already affected them. Similar observations were noted in  
426 Guinea, Sierra Leone and Nigeria.

## 427 **DISCUSSIONS**

428 This study has investigated the profound impacts of infectious disease outbreaks on livelihoods,  
429 healthcare access, and health outcomes in West Africa, focusing on emerging diseases like  
430 COVID-19. Our findings reveal the intricate link between health and socio-economic stability,  
431 demonstrating how such outbreaks strain healthcare systems and disrupt socio-economic  
432 structures (WHO, 2016).

433 The recurring outbreaks in West Africa challenge the region's fragile healthcare infrastructure.  
434 Health facilities often face closures or reduced operations due to transmission fears, lack of  
435 protective equipment, and workforce attrition, leading to decreased healthcare services (Kieny et  
436 al., 2014). This exacerbates the burden of endemic diseases and hampers essential health services  
437 like maternal and child care, increasing morbidity and mortality from non-outbreak-related  
438 causes (Elston *et al.*, 2017).

439 Moreover, the socio-economic impact of these outbreaks extends beyond immediate health  
440 concerns. Livelihoods are severely affected, with communities facing job losses, economic

441 instability, and increased poverty. This disruption in economic activities complicates recovery  
442 and resilience(UNDP, 2020).

443 Our study underscores the need for robust healthcare systems and comprehensive preparedness  
444 and response strategies that address both health and socio-economic aspects. Strengthening  
445 healthcare infrastructure, ensuring an adequate supply of protective equipment, and maintaining  
446 essential health services during outbreaks are crucial(WHO, 2015). Additionally, socio-economic  
447 support for affected communities and measures to sustain livelihoods are vital in mitigating the  
448 overall impact of such crises(Maxmen, 2020).

## 449 450 **CONCLUSIONS**

451 In conclusion, our research highlights the extensive disruptions caused by infectious disease  
452 outbreaks in West Africa, affecting healthcare access, health outcomes, and socio-economic  
453 contexts. The recurrent nature of these outbreaks necessitates an urgent and holistic approach to  
454 healthcare system strengthening and preparedness(Kieny and Dovlo, 2015).

455 Our findings call for integrated strategies that address both the health and socio-economic  
456 dimensions of outbreak response. Ensuring robust healthcare systems, alongside socio-economic  
457 support mechanisms, is essential for the resilience of West African countries(Kieny and Dovlo,  
458 2015; Gebremeskel *et al.*, 2021).

459  
460 Future research should focus on developing and evaluating interventions that effectively bridge  
461 the gap between health and socio-economic needs during outbreaks. The lessons learned from  
462 West Africa are crucial for global strategies in managing infectious disease outbreaks,  
463 emphasizing a multidimensional approach that considers both health and livelihoods(UNDP,  
464 2020).

465  
466 The resilience of West Africa against future health crises depends on learning from past  
467 experiences and preparing proactively for multifaceted challenges. This study contributes to that  
468 understanding and advocates for continued efforts to strengthen the region against the challenges  
469 posed by infectious disease outbreaks(Maxmen, 2020).

## 470 471 472 **References**

473  
474 Ansumana, R. *et al.* (2014) 'Ebola in Sierra Leone: A call for action', *The Lancet*, p. 303. doi:  
475 10.1016/S0140-6736(14)61119-3.

476 Ansumana, R., Sankoh, O. and Zumla, A. (2020) 'Effects of disruption from COVID-19 on  
477 antimalarial strategies', *Nature Medicine*. doi: 10.1038/s41591-020-1047-5.

- 478 Barrett, C. B. (2010) ‘Measuring Food Insecurity’, *Science*, 327(5967), pp. 825–828. doi:  
479 10.1126/science.1182768.
- 480 Belton, B. *et al.* (2021) ‘COVID-19 impacts and adaptations in Asia and Africa’s aquatic food  
481 value chains’, *Marine Policy*, 129, p. 104523. doi: 10.1016/j.marpol.2021.104523.
- 482 Béné, C. (2020) ‘Resilience of local food systems and links to food security - A review of some  
483 important concepts in the context of COVID-19 and other shocks.’, *Food security*, 12(4), pp.  
484 805–822. doi: 10.1007/s12571-020-01076-1.
- 485 Beyene, S. D. (2023) ‘The impact of food insecurity on health outcomes: empirical evidence  
486 from sub-Saharan African countries’, *BMC Public Health*, 23(1), p. 338. doi: 10.1186/s12889-  
487 023-15244-3.
- 488 Conrad, P. A., Meek, L. A. and Dumit, J. (2013) ‘Operationalizing a One Health approach to  
489 global health challenges.’, *Comparative immunology, microbiology and infectious diseases*,  
490 36(3), pp. 211–6. doi: 10.1016/j.cimid.2013.03.006.
- 491 Cooper, S. *et al.* (2023) ‘Vaccination coverage in rural Burkina Faso under the effects of  
492 COVID-19: evidence from a panel study in eight districts.’, *BMC health services research*,  
493 23(1), p. 1016. doi: 10.1186/s12913-023-10029-1.
- 494 Egeru, A., Dejene, S. W. and Siya, A. (2020) ‘Short report on implications of Covid-19 and  
495 emerging zoonotic infectious diseases for pastoralists and Africa.’, *Pastoralism* □: *research,*  
496 *policy and practice*, 10(1), p. 12. doi: 10.1186/s13570-020-00173-2.
- 497 Elston, J W T *et al.* (2017) ‘The health impact of the 2014-15 Ebola outbreak.’, *Public health*,  
498 143, pp. 60–70. doi: 10.1016/j.puhe.2016.10.020.
- 499 Elston, J. W.T. *et al.* (2017) ‘The health impact of the 2014–15 Ebola outbreak’, *Public Health*.  
500 doi: 10.1016/j.puhe.2016.10.020.
- 501 FAO (2018) *Nutrition and food systems. A report by the High Level Panel of Experts on Food*  
502 *Security and Nutrition of the Committee on World Food Security*. ROME. Available at:  
503 <https://www.fao.org/documents/card/en?details=I7846E>.
- 504 FAO (2021) *The State of Food and Agriculture 2021: Making agrifood systems more resilient to*  
505 *shocks and stresses*. ROME: FAO. Available at:  
506 <https://www.fao.org/documents/card/en?details=cb4476en>.
- 507 Gebremeskel, A. T. *et al.* (2021) ‘Building resilient health systems in Africa beyond the COVID-  
508 19 pandemic response’, *BMJ Global Health*, 6(6), p. e006108. doi: 10.1136/bmjgh-2021-  
509 006108.
- 510 González-Monroy, C. *et al.* (2021) ‘Eating Behaviour Changes during the COVID-19 Pandemic:  
511 A Systematic Review of Longitudinal Studies’, *International Journal of Environmental*  
512 *Research and Public Health*, 18(21), p. 11130. doi: 10.3390/ijerph182111130.
- 513 Headey, D. D. and Martin, W. J. (2016) ‘The Impact of Food Prices on Poverty and Food  
514 Security’, *Annual Review of Resource Economics*, 8(1), pp. 329–351. doi: 10.1146/annurev-  
515 resource-100815-095303.

- 516 Hendriks, S. L. *et al.* (2022) ‘Global environmental climate change, covid-19, and conflict  
517 threaten food security and nutrition.’, *BMJ (Clinical research ed.)*, 378, p. e071534. doi:  
518 10.1136/bmj-2022-071534.
- 519 Kieny, M. P. and Dovlo, D. (2015) ‘Beyond Ebola: a new agenda for resilient health systems’,  
520 *The Lancet*, 385(9963), pp. 91–92. doi: 10.1016/S0140-6736(14)62479-X.
- 521 Kipchumba Kipruto, H. *et al.* (2023) ‘Estimating the economic impact of COVID-19 disruption  
522 on access to sexual and reproductive health and rights in Eastern and Southern Africa.’,  
523 *Frontiers in public health*, 11, p. 1144150. doi: 10.3389/fpubh.2023.1144150.
- 524 Kofman, A., Choi, M. J. and Rollin, P. E. (2019) ‘Lassa fever in travelers from West Africa,  
525 1969–2016’, *Emerging Infectious Diseases*. doi: 10.3201/eid2502.180836.
- 526 Koyratty, N. *et al.* (2022) ‘Food Insecurity and COVID-19 Food-Related Perceptions, Practices,  
527 and Problems: A 3-State Descriptive Study.’, *Disaster medicine and public health preparedness*,  
528 17, p. e288. doi: 10.1017/dmp.2022.250.
- 529 Lewis, M. *et al.* (2023) ‘Healthy Food Prices Increased More Than the Prices of Unhealthy  
530 Options during the COVID-19 Pandemic and Concurrent Challenges to the Food System.’,  
531 *International journal of environmental research and public health*, 20(4). doi:  
532 10.3390/ijerph20043146.
- 533 Marti, L. and Puertas, R. (2022) ‘Link between structural risk factors for adverse impacts of  
534 COVID-19 and food insecurity in developed and developing countries.’, *Environment*,  
535 *development and sustainability*, pp. 1–20. doi: 10.1007/s10668-022-02749-x.
- 536 Maxmen, A. (2020) ‘Ebola prepared these countries for coronavirus — but now even they are  
537 floundering’, *Nature*, 583(7818), pp. 667–668. doi: 10.1038/d41586-020-02173-z.
- 538 Mylne, A. Q. N. *et al.* (2015) ‘Mapping the zoonotic niche of Lassa fever in Africa.’,  
539 *Transactions of the Royal Society of Tropical Medicine and Hygiene*, 109(8), pp. 483–92. doi:  
540 10.1093/trstmh/trv047.
- 541 Ogbu, O., Ajuluchukwu, E. and Uneke, C. J. (2007) ‘Lassa fever in West African sub-region: an  
542 overview.’, *Journal of vector borne diseases*, 44, pp. 1–11.
- 543 Olival, K. J. and Hayman, D. T. S. (2014) ‘Filoviruses in bats: current knowledge and future  
544 directions.’, *Viruses*, 6(4), pp. 1759–88. doi: 10.3390/v6041759.
- 545 Parpia, A. S. *et al.* (2016) ‘Effects of Response to 2014-2015 Ebola Outbreak on Deaths from  
546 Malaria, HIV/AIDS, and Tuberculosis, West Africa.’, *Emerging infectious diseases*, 22(3), pp.  
547 433–41. doi: 10.3201/eid2203.150977.
- 548 R., A. *et al.* (2017) ‘Impact of infectious disease epidemics on tuberculosis diagnostic,  
549 management, and prevention services: experiences and lessons from the 2014-2015 Ebola virus  
550 disease outbreak in West Africa’, *International Journal of Infectious Diseases*.
- 551 Rich, K. M. and Wanyoike, F. (2010) ‘An assessment of the regional and national socio-  
552 economic impacts of the 2007 Rift Valley fever outbreak in Kenya.’, *The American journal of*  
553 *tropical medicine and hygiene*, 83(2 Suppl), pp. 52–7. doi: 10.4269/ajtmh.2010.09-0291.

- 554 Schreiber, K. *et al.* (2022) ‘Diverse adaptation strategies helped local food producers cope with  
555 initial challenges of the Covid-19 pandemic: Lessons from Québec, Canada’, *Journal of Rural*  
556 *Studies*, 90, pp. 124–133. doi: 10.1016/j.jrurstud.2022.02.002.
- 557 Shultz, J. M. *et al.* (2016) ‘The Role of Fear-Related Behaviors in the 2013-2016 West Africa  
558 Ebola Virus Disease Outbreak.’, *Current psychiatry reports*, 18(11), p. 104. doi:  
559 10.1007/s11920-016-0741-y.
- 560 Smith, C. and Whittaker, M. (2014) ‘Beyond mobile populations: a critical review of the  
561 literature on malaria and population mobility and suggestions for future directions.’, *Malaria*  
562 *journal*, 13, p. 307. doi: 10.1186/1475-2875-13-307.
- 563 Sumner, A., Hoy, C. and Ortiz-Juarez, E. (2020) ‘Estimates of the impact of COVID-19 on  
564 global poverty’, *Unuwidder*.
- 565 Tambo, E., Adetunde, O. T. and Olalubi, O. A. (2018) ‘Re-emerging Lassa fever outbreaks in  
566 Nigeria: Re-enforcing “One Health” community surveillance and emergency response practice’,  
567 *Infectious Diseases of Poverty*. doi: 10.1186/s40249-018-0421-8.
- 568 UNDP (2020) *Human Development Report. The Next Frontier: Human Development and the*  
569 *Anthropocene*. New York.
- 570 Vinck, P. *et al.* (2019) ‘Institutional trust and misinformation in the response to the 2018-19  
571 Ebola outbreak in North Kivu, DR Congo: a population-based survey.’, *The Lancet. Infectious*  
572 *diseases*, 19(5), pp. 529–536. doi: 10.1016/S1473-3099(19)30063-5.
- 573 WFP (2020) *COVID-19 will double number of people facing food crises unless swift action is*  
574 *taken*. Available at: [https://www.wfp.org/news/covid-19-will-double-number-people-facing-](https://www.wfp.org/news/covid-19-will-double-number-people-facing-food-crises-unless-swift-action-taken)  
575 [food-crises-unless-swift-action-taken](https://www.wfp.org/news/covid-19-will-double-number-people-facing-food-crises-unless-swift-action-taken) (Accessed: 10 August 2023).
- 576 WHO (2015) *Health worker Ebola infections in Guinea, Liberia and Sierra Leone*. Available at:  
577 [http://www.who.int/hrh/documents/21may2015\\_web\\_final.pdf](http://www.who.int/hrh/documents/21may2015_web_final.pdf) (Accessed: 5 October 2016).
- 578 WHO (2016) ‘After Ebola in West Africa — Unpredictable Risks, Preventable Epidemics’, *New*  
579 *England Journal of Medicine*, 375(6), pp. 587–596. doi: 10.1056/NEJMSr1513109.
- 580 World Bank (2020) *Responding to the Emerging Food Security Crisis*. Washington DC.  
581 Available at: [https://documents.worldbank.org/en/publication/documents-](https://documents.worldbank.org/en/publication/documents-reports/documentdetail/775981606955884100/responding-to-the-emerging-food-security-crisis)  
582 [reports/documentdetail/775981606955884100/responding-to-the-emerging-food-security-crisis](https://documents.worldbank.org/en/publication/documents-reports/documentdetail/775981606955884100/responding-to-the-emerging-food-security-crisis).

583

## 584 **CONFLICT OF INTEREST**

585 All authors declare that there is not conflict of interest

586

## 587 **AUTHOR CONTRIBUTIONS**

588

589 RA, ASB, SC, JG, NM, SM, NH, OD, GM were involved in study conception. RA, ASB, JML,  
590 MK were involved in drafting the manuscript. All authors reviewed and revised the manuscript.

591 JML and ASB developed data collection tool. RA, ASB, MK, JML, JG, SC, EC, NM, supervised  
592 data collection. RA, ASB, analyzed data.  
593

#### 594 **FUNDING**

595 Funding for this study was provided by the Canadian, International Development Research  
596 Center under the Collaborative One Health Research Initiative on Epidemics (COHRIE).

#### 597 **ACKNOWLEDGMENTS**

598 We acknowledge all data collectors in Sierra Leone, Guinea, Liberia and Nigeria.

#### 599 **DATA AVAILABILITY STATEMENT**

600 Datasets generated for this study can be found at <https://ona.io/waohecostudy/197244> and  
601 <https://sl.dhis2.org/>. Transcripts of qualitative data are available on request.  
602  
603  
604  
605  
606  
607  
608  
609  
610  
611  
612  
613  
614  
615  
616  
617  
618  
619  
620  
621  
622  
623  
624  
625  
626  
627

**Table 1: Meal Frequency Table**

| Country | Meal Frequency | Before Outbreak | During Outbreak | P-Value |
|---------|----------------|-----------------|-----------------|---------|
| Guinea  | Once Daily     | 148             | 775             | 0.00    |

|                     |              |      |      |      |
|---------------------|--------------|------|------|------|
|                     | Thrice Daily | 3687 | 3078 | 0.00 |
|                     | Twice Daily  | 1721 | 1689 | 0.72 |
| <b>Liberia</b>      | Once Daily   | 2178 | 4345 | 0.00 |
|                     | Thrice Daily | 310  | 70   | 0.00 |
|                     | Twice Daily  | 3222 | 1280 | 0.00 |
| <b>Nigeria</b>      | Once Daily   | 11   | 98   | 0.00 |
|                     | Thrice Daily | 1212 | 755  | 0.00 |
|                     | Twice Daily  | 244  | 634  | 0.00 |
| <b>Sierra Leone</b> | Once Daily   | 1806 | 2872 | 0.00 |
|                     | Thrice Daily | 523  | 203  | 0.00 |
|                     | Twice Daily  | 3374 | 2620 | 0.00 |

628

629



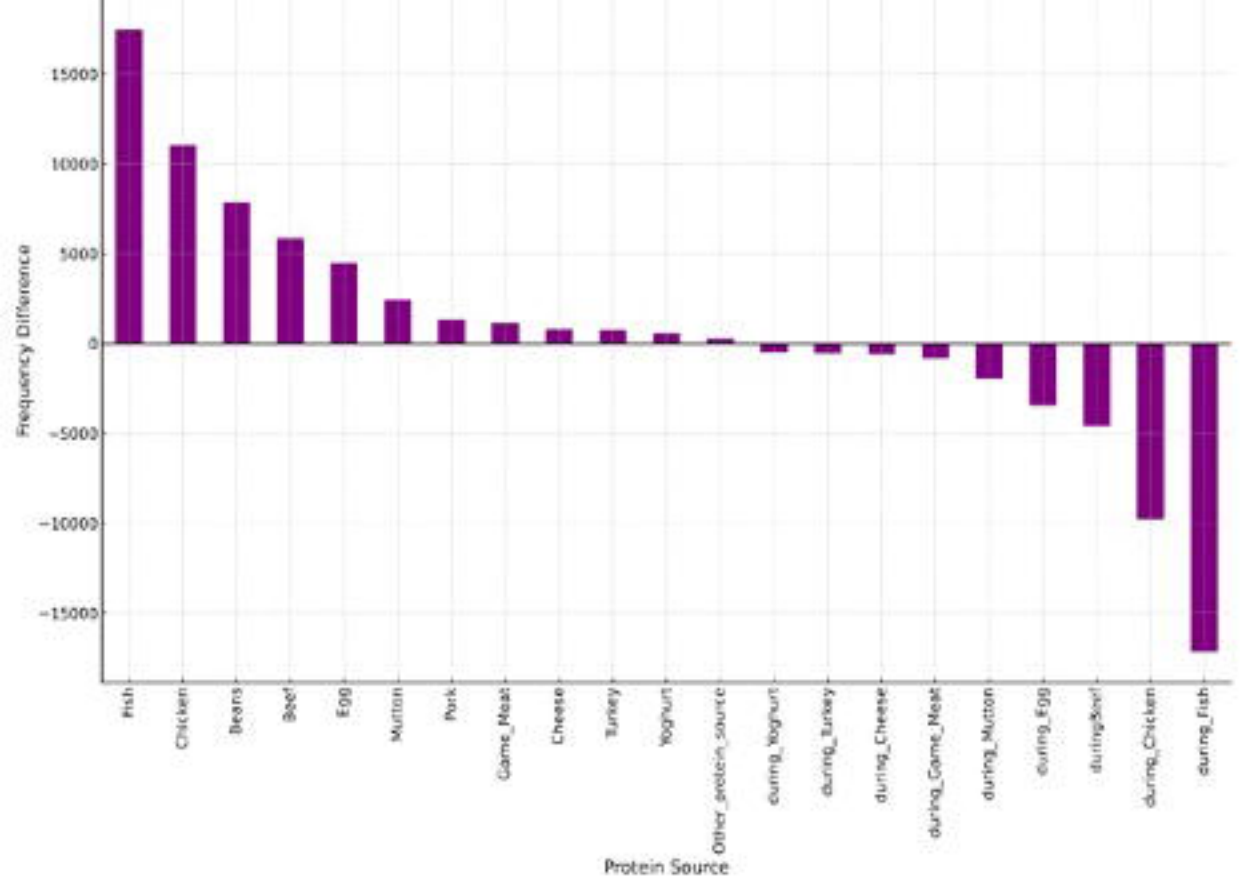

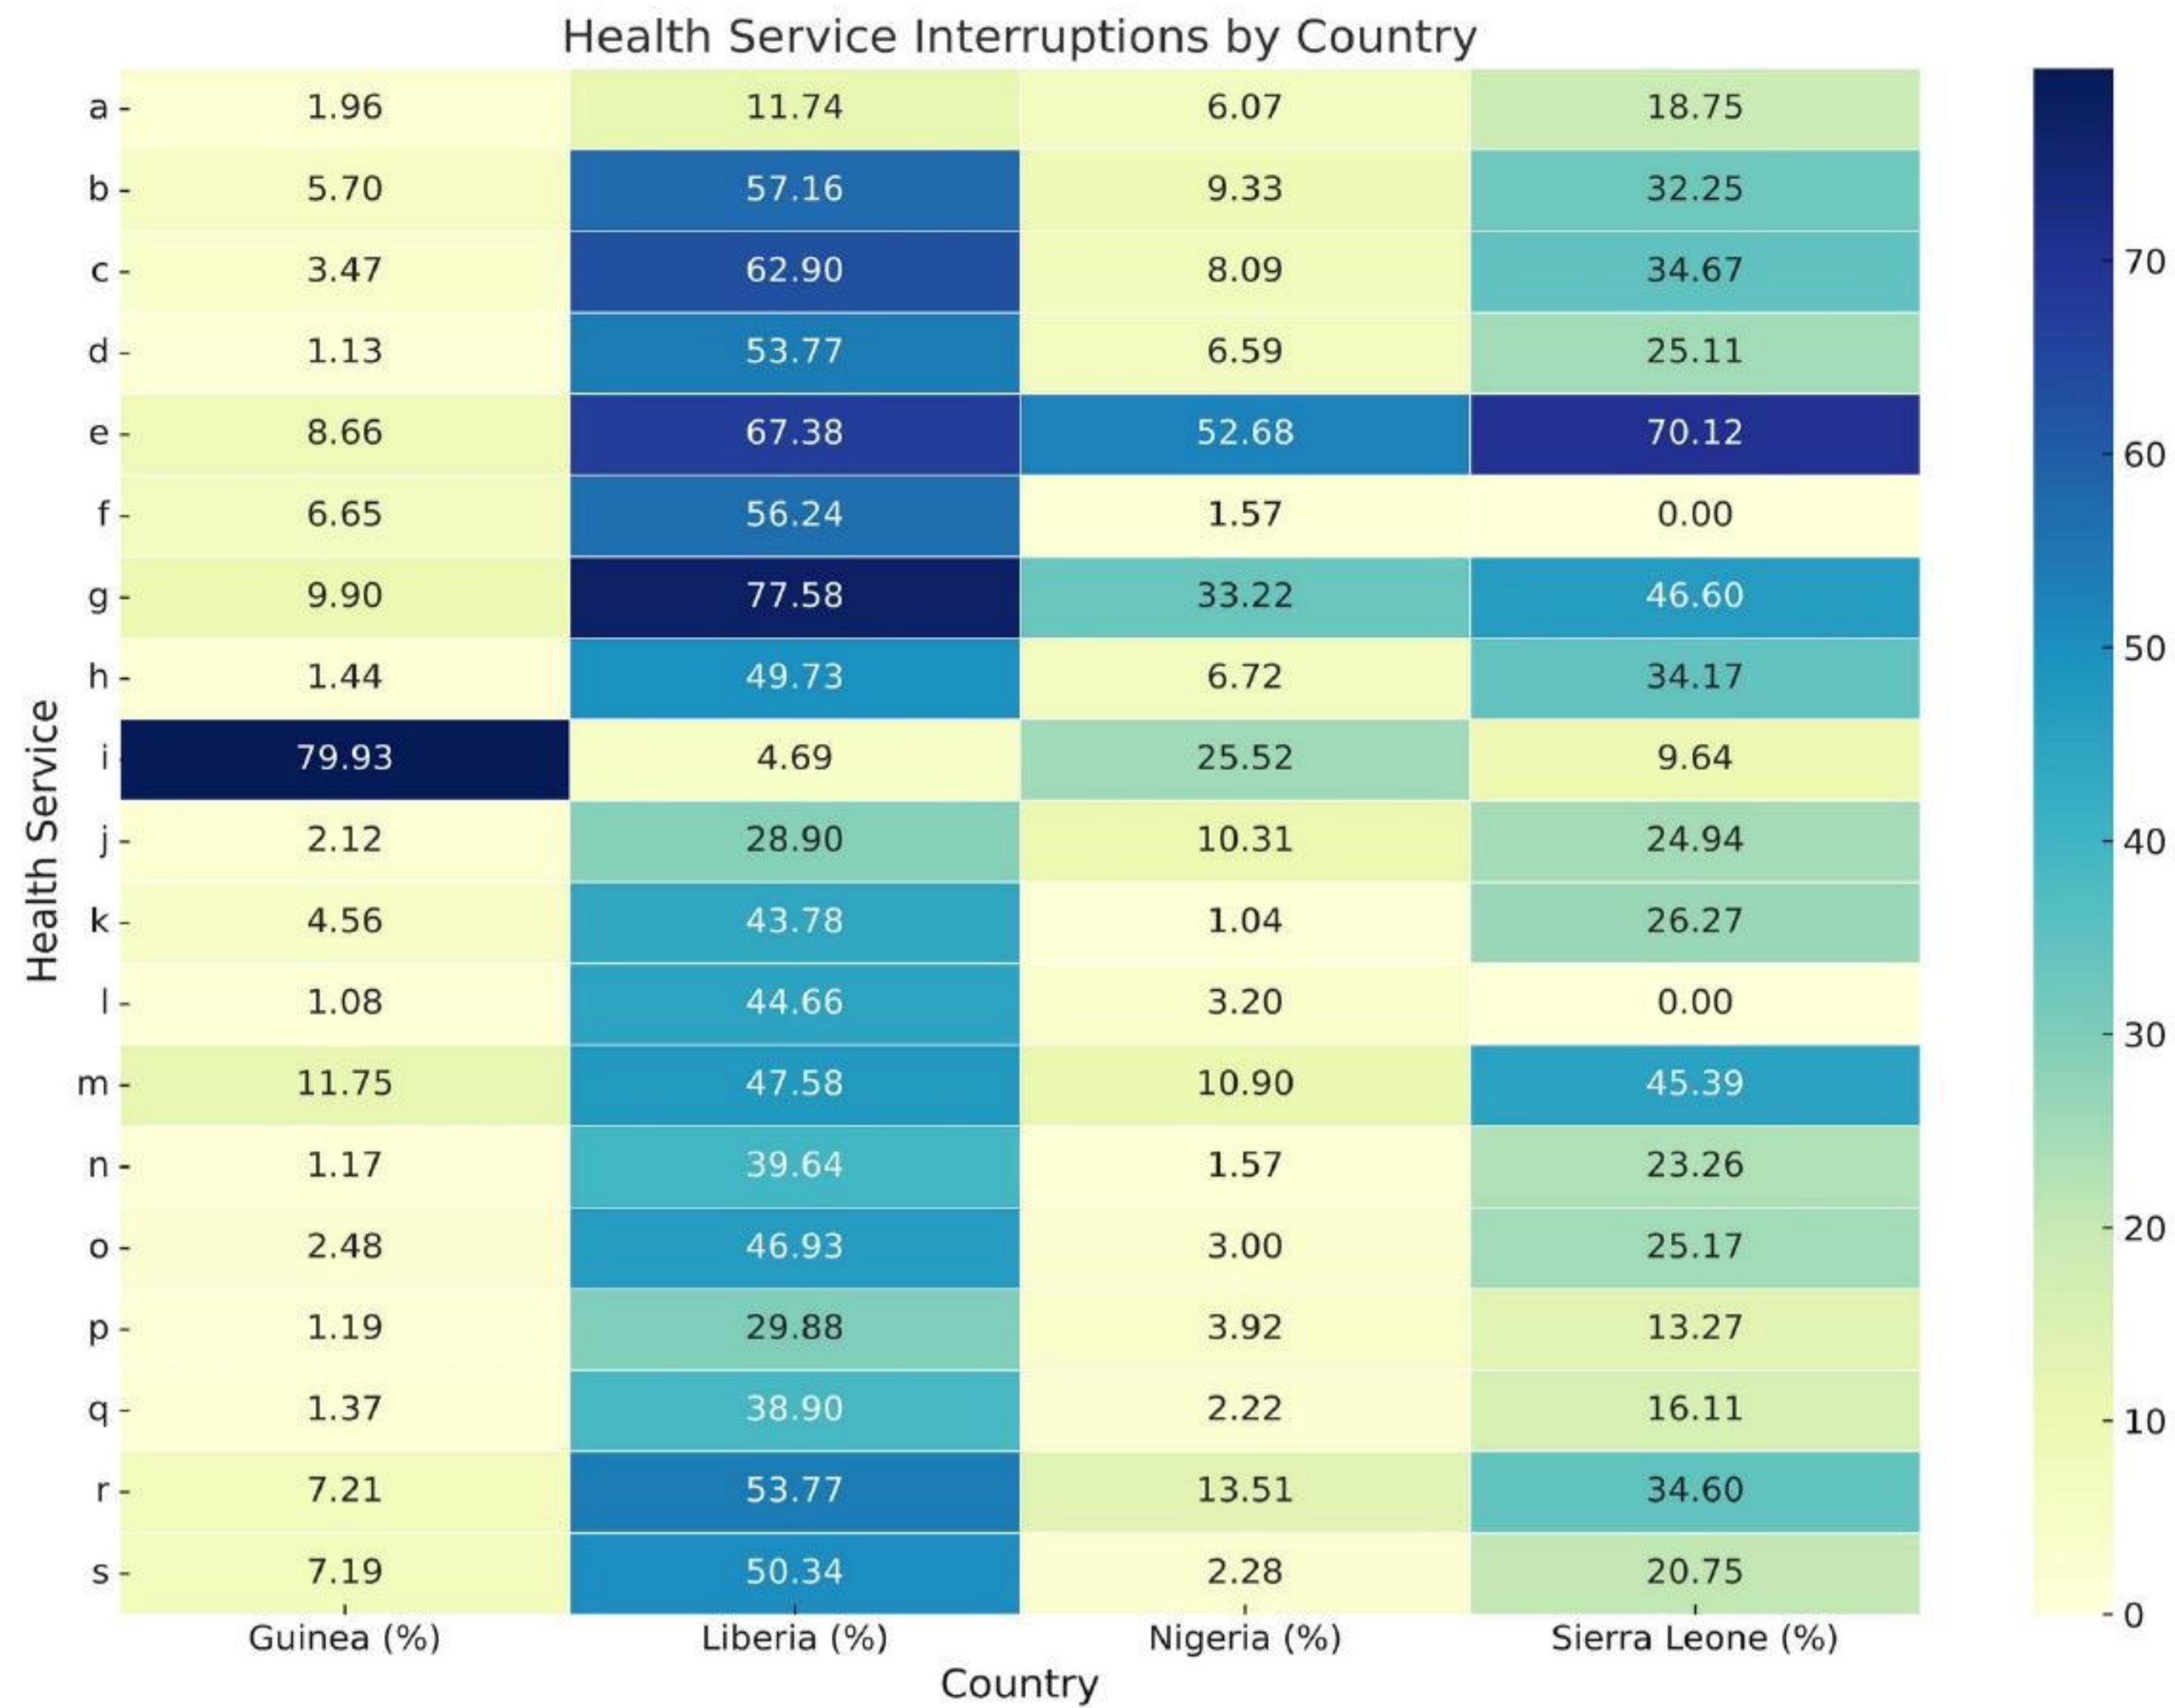

|                                                                             |                                                                  |
|-----------------------------------------------------------------------------|------------------------------------------------------------------|
| <b>a: Pharmaceutical services</b>                                           | <b>k: Interrupted Pentavalent vaccination</b>                    |
| <b>b: Interrupted Antenatal Care</b>                                        | <b>l: interrupted Reproductive Health Services</b>               |
| <b>c: Interrupted Family Planning</b>                                       | <b>m: Interrupted Routine Bednet Distribution</b>                |
| <b>d: Interrupted HIV &amp; AIDS Services</b>                               | <b>n: Interrupted Services for NCDs</b>                          |
| <b>e: Interrupted Immunization</b>                                          | <b>o: Interrupted Severe Acute Malnutrition Services</b>         |
| <b>f: Interrupted Intermittent Preventive Treatment in Pregnancy (IPTp)</b> | <b>p: Interrupted Surgery</b>                                    |
| <b>g: interrupted Malaria Treatment</b>                                     | <b>q: Interrupted TB Services</b>                                |
| <b>h: interrupted Nutrition Preventive</b>                                  | <b>r: Interrupted Vitamin A supplementation for 12_59_months</b> |
| <b>i: Interrupted Other</b>                                                 | <b>s: Interrupted BCG among Under 1-year Children</b>            |
| <b>j: Interrupted Outpatient Services</b>                                   |                                                                  |

**Fig. 2: Healthcare Services Disruption Reported by Country**

Rate of Healthcare Service Disruptions by Country

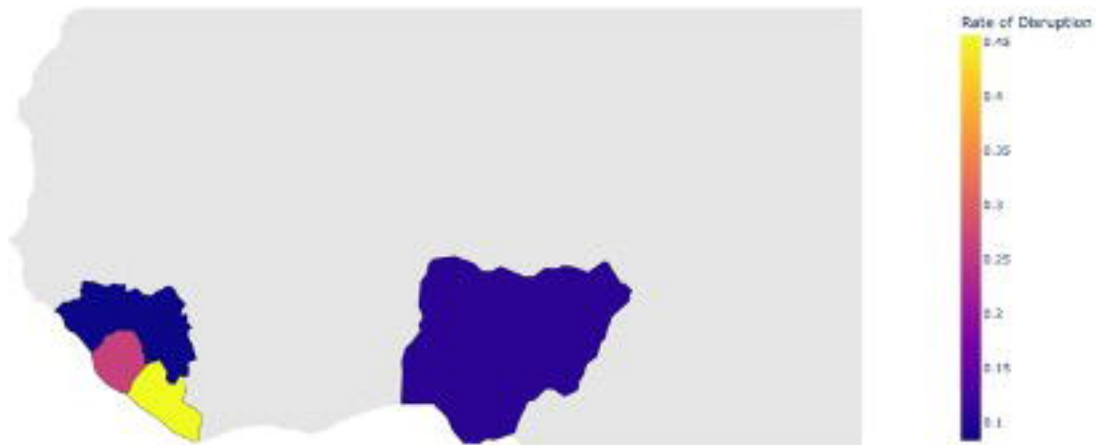

# Top Disruptions in HIV Services from 2019 to 2020

Service

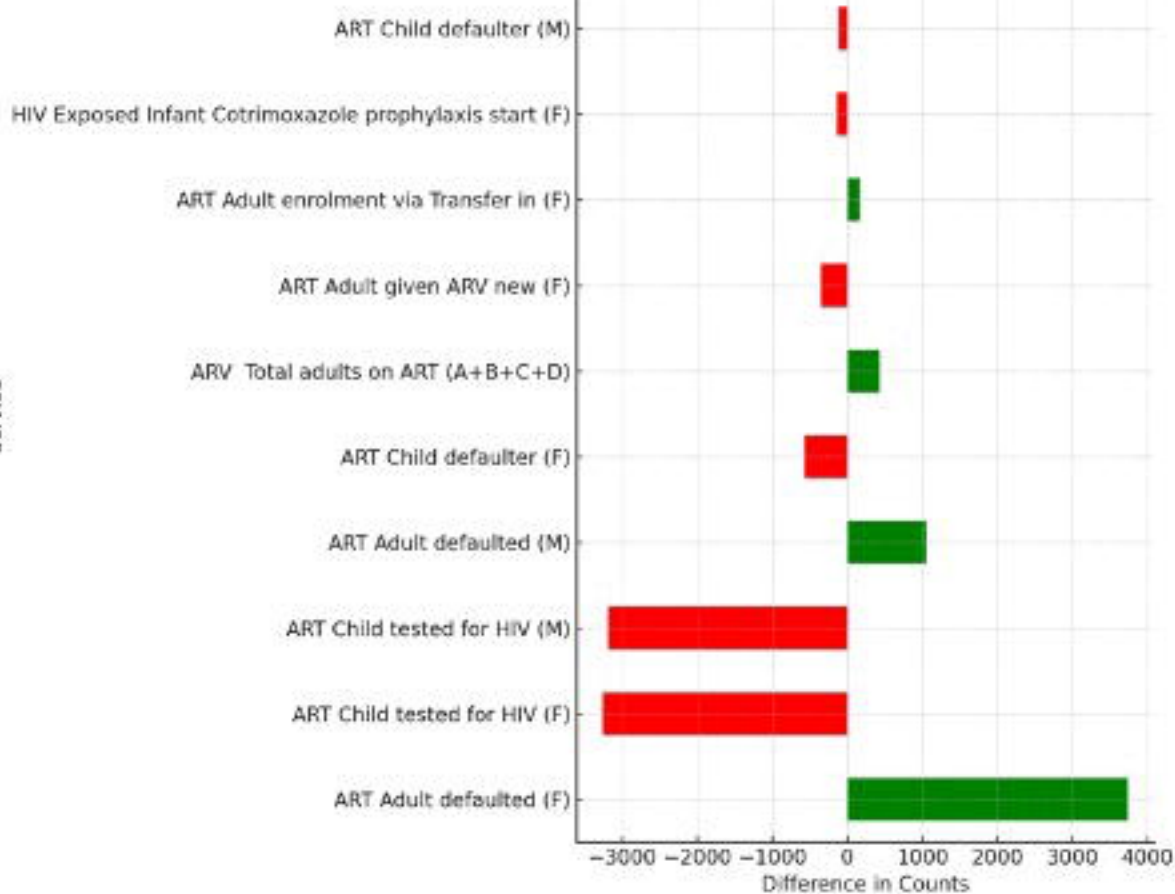

Trends in TB Treatment (2019-2021)

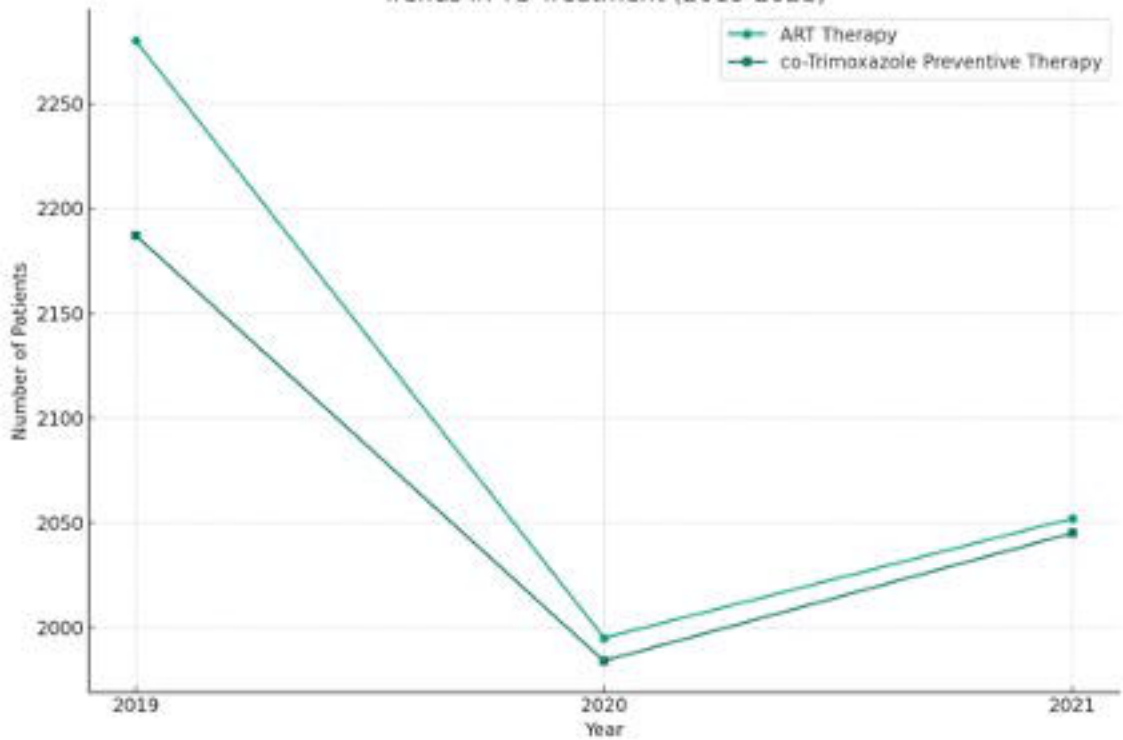

### Hospital Admissions and Year-Over-Year Change in Sierra Leone

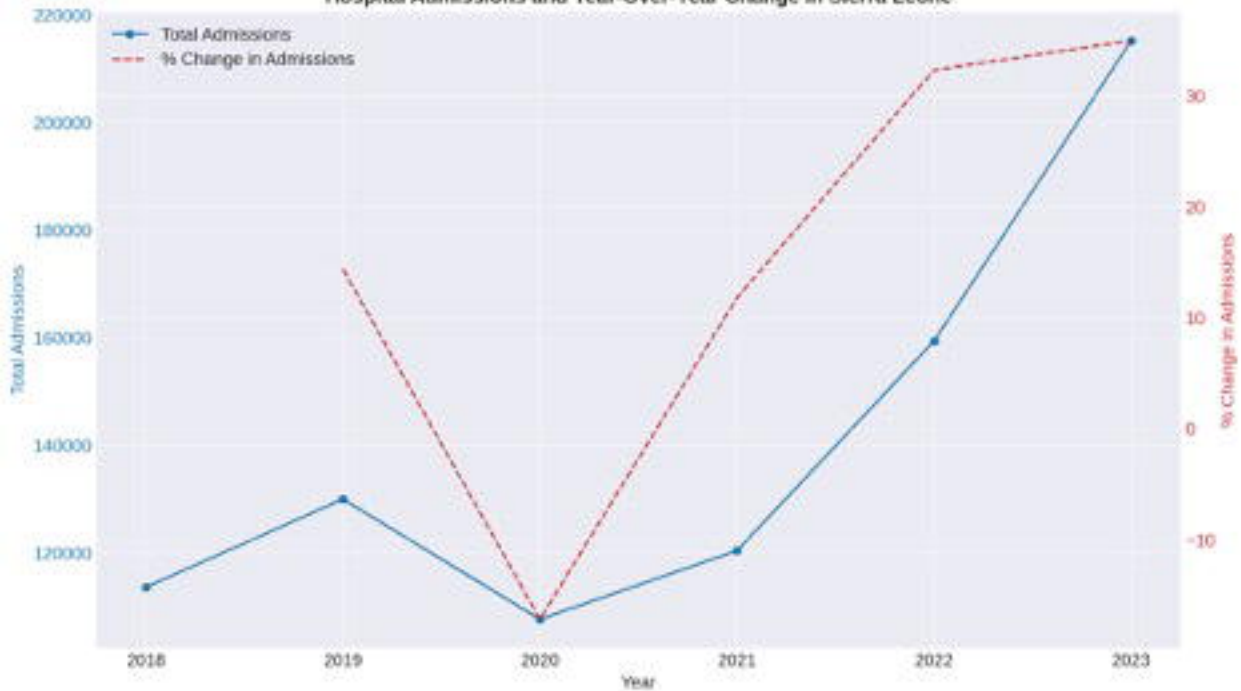

Hospital Admissions Trends (2018-2022)

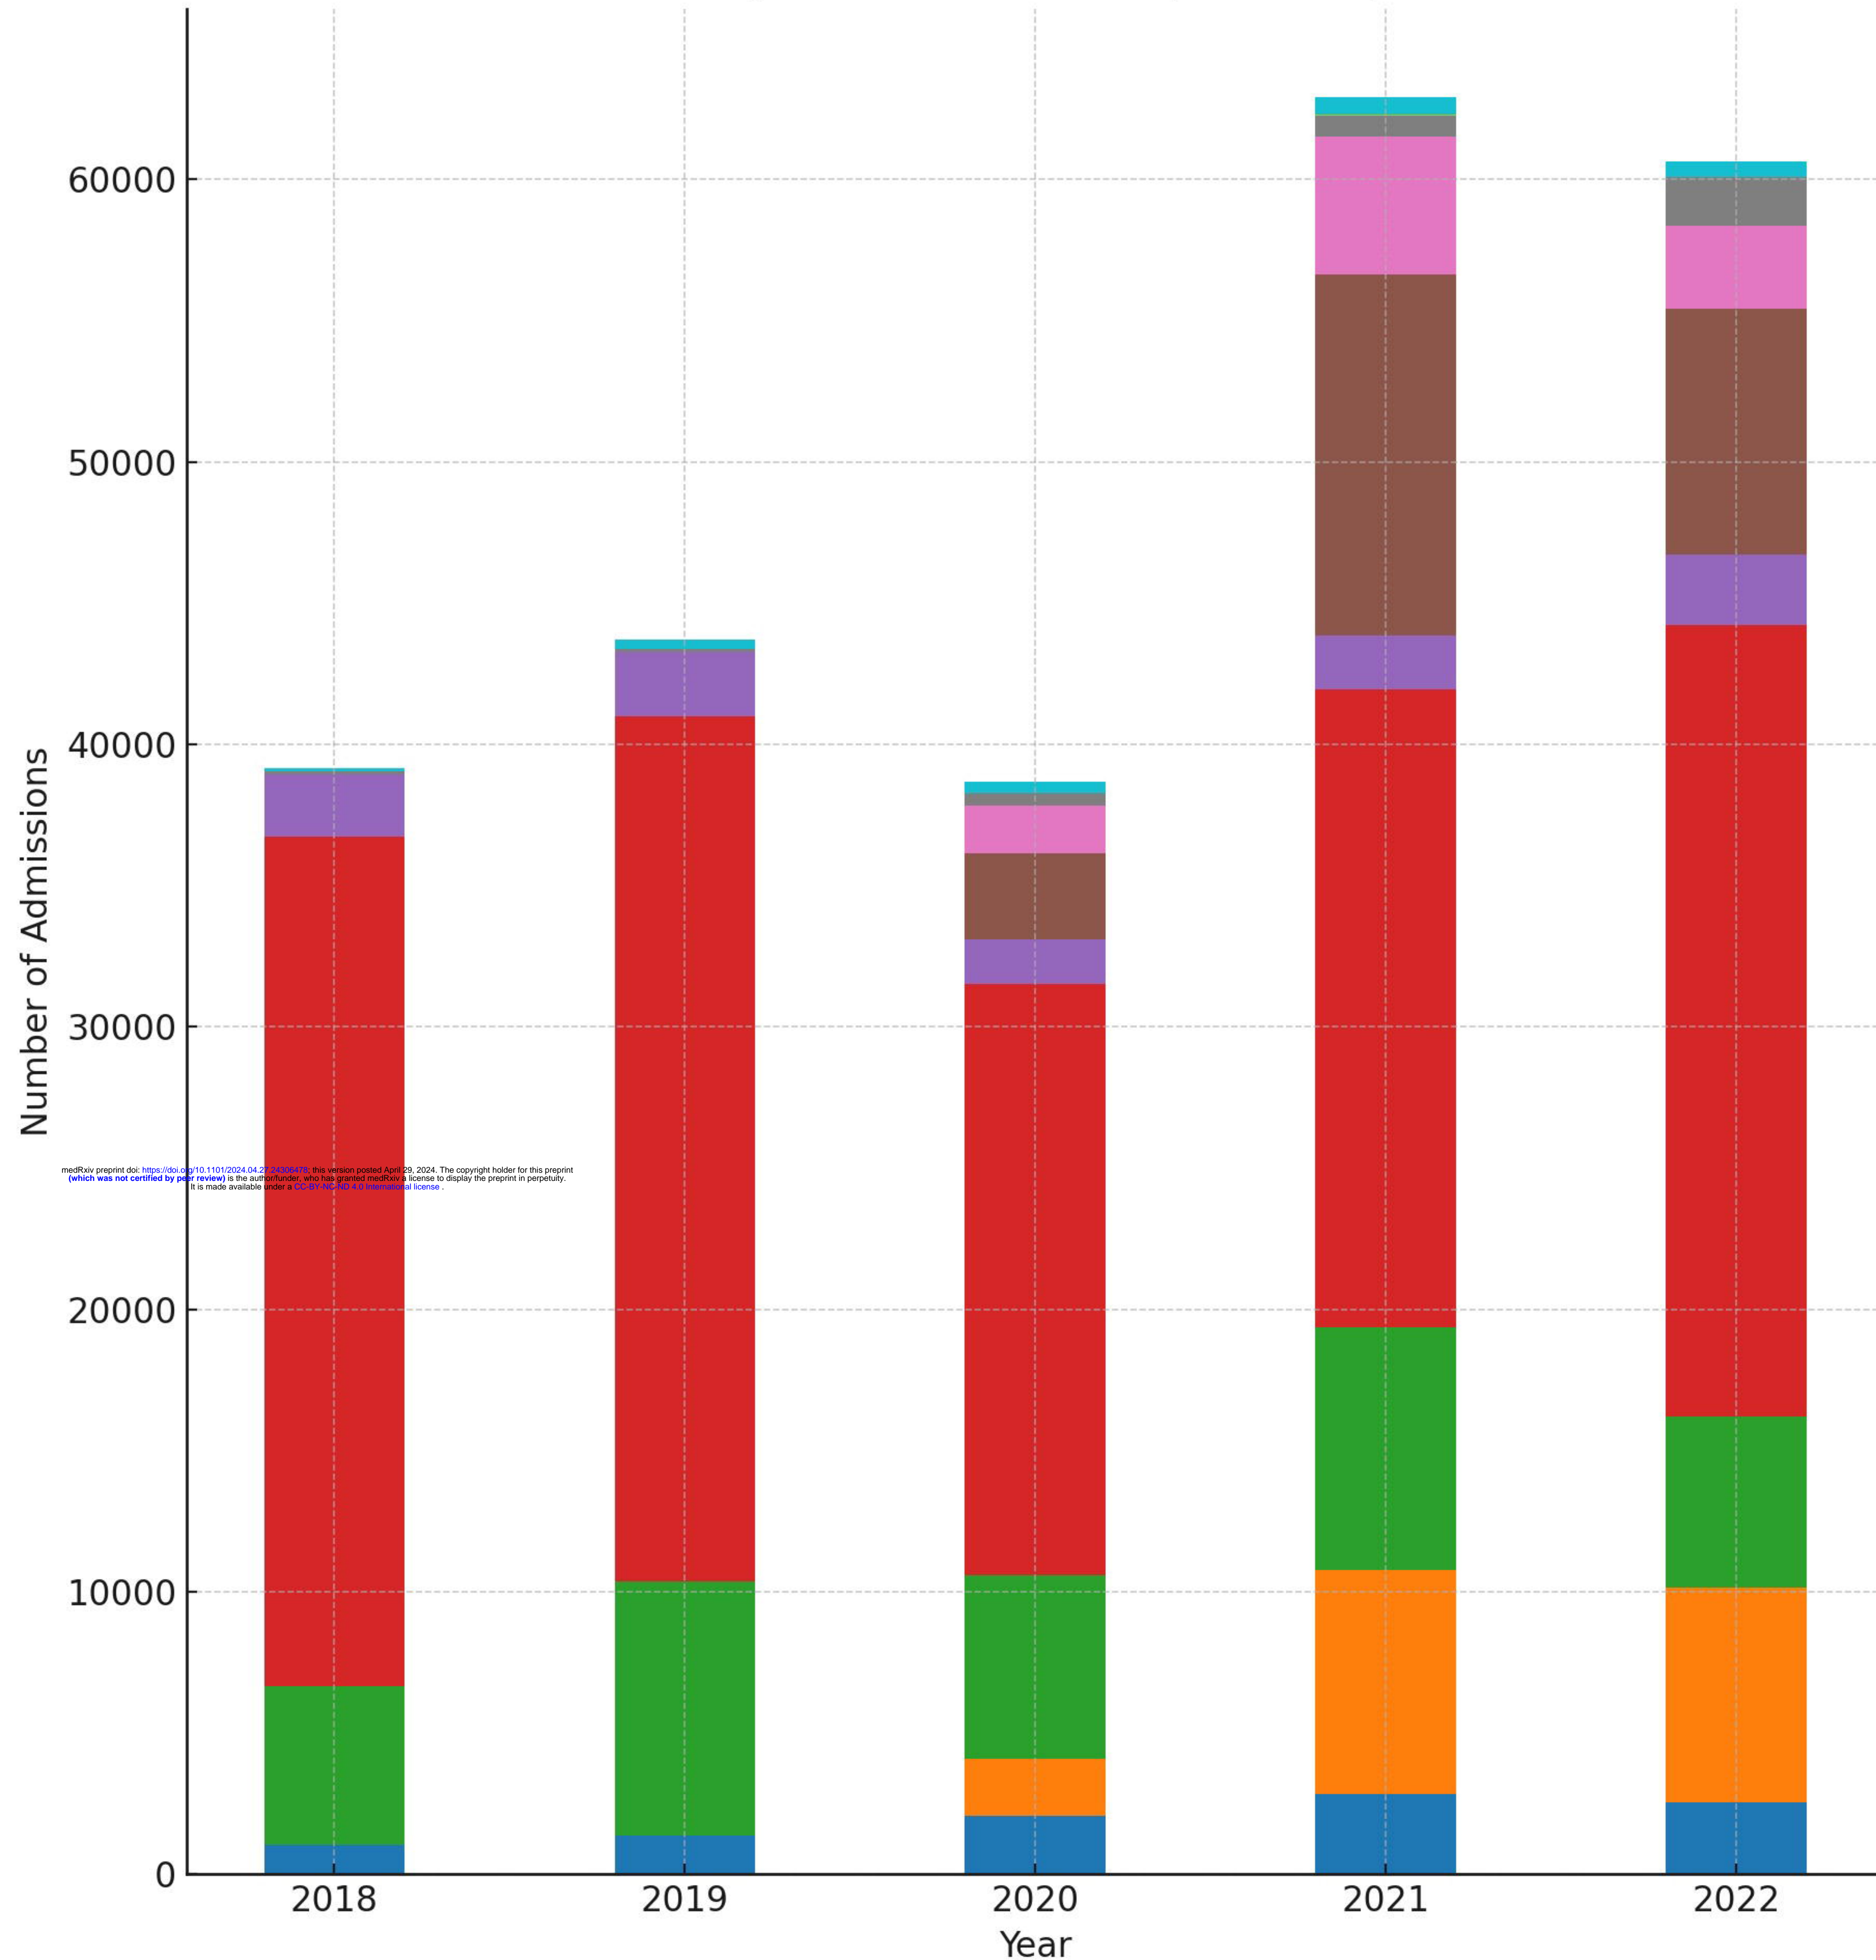

- Intensive Care Admissions
- Pneumonia Admissions (Children)
- Malaria Admissions (15+)
- Malaria Admissions (Children)
- Admission - Child with Diarrhoea
- Separation - Surgical
- Admission - Antenatal Client with Malaria
- Separation - TB
- Admission - Ebola Survivor
- Separation - Psychiatry

medRxiv preprint doi: <https://doi.org/10.1101/2024.04.27.24101010>; this version posted April 29, 2024. The copyright holder for this preprint (which was not certified by peer review) is the author/funder, who has granted medRxiv a license to display the preprint in perpetuity. It is made available under a CC-BY-NC-ND 4.0 International license.
